# Supplementary material for: Differential effects of PD-L1 versus PD-1 blockade on myeloid inflammation in human cancer
Source: JCI journal article supplement (doi:10.1172/jci.insight.129353), 2020-05-19

# Supplementary Data

## Table of Contents

|                |                                                                                                                                |
|----------------|--------------------------------------------------------------------------------------------------------------------------------|
| <b>Tables</b>  |                                                                                                                                |
| Table S1       | Pathways enriched in circulating monocytes following therapy with anti-PD-L1 <i>in vivo</i> .                                  |
| Table S2       | Clinical Characteristics.                                                                                                      |
| Table S3       | Differentially regulated pathways in bone marrow immune cells following therapy with anti-PD-L1.                               |
| Table S4       | Differentially regulated pathways in peripheral blood immune cells following therapy with anti-PD-L1.                          |
| Table S5       | List of antibody clones used for CyTOF.                                                                                        |
| <b>Figures</b> |                                                                                                                                |
| Figure S1      | Single-cell RNA sequencing differential gene expression in classical (CD14+ CD16-) monocytes post vs. pre anti-PD-L1 treatment |
| Figure S2      | Changes in circulating immune cells of AMM patient following therapy with atezolizumab.                                        |
| Figure S3      | Changes in plasma cytokines following therapy with atezolizumab in AMM patients.                                               |
| Figure S4      | Changes in transcriptome profile in PBMCs following therapy with atezolizumab.                                                 |
| Figure S5      | Atezolizumab-induced changes in myeloid cells in culture                                                                       |

**Table S1.** Pathways enriched in circulating monocytes following therapy with anti-PD-L1 *in vivo*.

| <b>Pathway</b>                                                  | <b>FDR</b> |
|-----------------------------------------------------------------|------------|
| IL-1 signaling in melanoma                                      | 3.59E-07   |
| Immune response_IL-1 signaling pathway                          | 4.81E-07   |
| Cell adhesion_IL-8 family dependent cell migration and adhesion | 1.82E-07   |
| IL-1 production in melanoma                                     | 4.65E-06   |
| Immune response_IL-18 signaling                                 | 2.99E-05   |
| Immune response_IL-17 signaling pathways                        | 2.99E-05   |
| Macrophage and dendritic cell phenotype shift in cancer         | 6.45E-05   |

**Table S2.** Clinical Characteristics.

|                          | <b>Patient 1</b>                                        | <b>Patient 2</b> |
|--------------------------|---------------------------------------------------------|------------------|
| Age (years)              | 59                                                      | 54               |
| Sex                      | Male                                                    | Male             |
| M spike IgH/L isotype    | IgA kappa                                               | IgG Lambda       |
| Total number of cycles   | 7                                                       | 1                |
| IrAE ( $\geq$ grade 2)   | Grade 2 adrenal insufficiency<br>Grade 2 hypothyroidism | None             |
| Best Response to therapy | Stable disease                                          | Stable disease   |

**Table S3.** Differentially regulated pathways in bone marrow immune cells following therapy with anti-PD-L1.

|                      | <b>Pathway</b>            | <b>FDR q-value</b> |
|----------------------|---------------------------|--------------------|
| <b>T cells</b>       |                           |                    |
| Cluster 0            | ALLOGRAFT_REJECTION       | 3.13E-18           |
|                      | TNFA_SIGNALING_VIA_NFKB   | 4.63E-17           |
|                      | HYPOXIA                   | 2.31E-10           |
|                      | APOPTOSIS                 | 3.09E-10           |
|                      | COMPLEMENT                | 2.55E-09           |
|                      | INFLAMMATORY_RESPONSE     | 3.55E-08           |
|                      | INTERFERON_GAMMA_RESPONSE | 4.00E-07           |
| Cluster 1            | TNFA_SIGNALING_VIA_NFKB   | 3.11E-16           |
|                      | HYPOXIA                   | 1.31E-12           |
|                      | APOPTOSIS                 | 2.50E-03           |
|                      | INFLAMMATORY_RESPONSE     | 3.14E-03           |
|                      | INTERFERON_GAMMA_RESPONSE | 3.14E-03           |
| Cluster 3            | TNFA_SIGNALING_VIA_NFKB   | 1.41E-14           |
|                      | COMPLEMENT                | 4.22E-07           |
|                      | INFLAMMATORY_RESPONSE     | 4.22E-07           |
|                      | APOPTOSIS                 | 6.24E-05           |
|                      | INTERFERON_GAMMA_RESPONSE | 1.42E-03           |
| Cluster 4            | HYPOXIA                   | 3.37E-13           |
|                      | TNFA_SIGNALING_VIA_NFKB   | 3.37E-13           |
|                      | INTERFERON_GAMMA_RESPONSE | 8.76E-04           |
| <b>NK cells</b>      |                           |                    |
| Cluster 2            | TNFA_SIGNALING_VIA_NFKB   | 3.27E-21           |
|                      | ALLOGRAFT_REJECTION       | 1.19E-16           |
|                      | COMPLEMENT                | 1.93E-09           |
|                      | HYPOXIA                   | 6.29E-06           |
|                      | INTERFERON_GAMMA_RESPONSE | 6.29E-06           |
| <b>Myeloid cells</b> |                           |                    |
| Cluster 5            | COMPLEMENT                | 2.43E-02           |
|                      | INFLAMMATORY_RESPONSE     | 2.43E-02           |
|                      | INTERFERON_GAMMA_RESPONSE | 2.43E-02           |
|                      | TNFA_SIGNALING_VIA_NFKB   | 2.43E-02           |
| Cluster 7            | INFLAMMATORY_RESPONSE     | 2.53E-02           |
| Cluster 8            | IL2_STAT5_SIGNALING       | 1.40E-02           |

**Table S4.** Differentially regulated pathways in peripheral blood immune cells following therapy with anti-PD-L1.

|                      | <b>Pathway</b>                  | <b>FDR q-value</b> |
|----------------------|---------------------------------|--------------------|
| <b>T cells</b>       |                                 |                    |
| Cluster 0            | INTERFERON_GAMMA_RESPONSE       | 1.26E-59           |
|                      | INTERFERON_ALPHA_RESPONSE       | 3.38E-53           |
|                      | INFLAMMATORY_RESPONSE           | 5.68E-10           |
|                      | IL2_STAT5_SIGNALING             | 1.00E-07           |
|                      | TNFA_SIGNALING_VIA_NFKB         | 1.00E-07           |
| Cluster 3            | INTERFERON_GAMMA_RESPONSE       | 6.29E-63           |
|                      | INTERFERON_ALPHA_RESPONSE       | 1.67E-56           |
|                      | COMPLEMENT                      | 7.21E-09           |
|                      | TNFA_SIGNALING_VIA_NFKB         | 2.35E-06           |
| Cluster 4            | INTERFERON_ALPHA_RESPONSE       | 7.16E-61           |
|                      | INTERFERON_GAMMA_RESPONSE       | 1.34E-60           |
|                      | INFLAMMATORY_RESPONSE           | 2.70E-06           |
|                      | TNFA_SIGNALING_VIA_NFKB         | 2.70E-06           |
| Cluster 6            | INTERFERON_GAMMA_RESPONSE       | 1.53E-16           |
|                      | INTERFERON_ALPHA_RESPONSE       | 9.58E-16           |
|                      | TNFA_SIGNALING_VIA_NFKB         | 5.42E-06           |
| <b>NK cells</b>      |                                 |                    |
| Cluster 1            | INTERFERON_GAMMA_RESPONSE       | 1.10E-73           |
|                      | INTERFERON_ALPHA_RESPONSE       | 3.26E-62           |
|                      | COMPLEMENT                      | 1.70E-12           |
|                      | IL2_STAT5_SIGNALING             | 5.86E-09           |
|                      | TNFA_SIGNALING_VIA_NFKB         | 6.88E-08           |
| Cluster 8            | INTERFERON_GAMMA_RESPONSE       | 1.28E-44           |
|                      | INTERFERON_ALPHA_RESPONSE       | 3.03E-35           |
| <b>Myeloid cells</b> |                                 |                    |
| Cluster 2            | INTERFERON_GAMMA_RESPONSE       | 3.75E-118          |
|                      | INTERFERON_ALPHA_RESPONSE       | 4.23E-85           |
|                      | TNFA_SIGNALING_VIA_NFKB         | 3.44E-32           |
|                      | INFLAMMATORY_RESPONSE           | 1.89E-26           |
|                      | COMPLEMENT                      | 3.43E-11           |
|                      | REACTIVE_OXYGEN_SPECIES_PATHWAY | 2.51E-06           |
|                      | FATTY_ACID_METABOLISM           | 2.77E-05           |
| Cluster 7            | INTERFERON_GAMMA_RESPONSE       | 1.28E-44           |
|                      | INTERFERON_ALPHA_RESPONSE       | 3.03E-35           |
| <b>B cells</b>       |                                 |                    |
| Cluster 5            | INTERFERON_ALPHA_RESPONSE       | 1.71E-34           |
|                      | INTERFERON_GAMMA_RESPONSE       | 6.09E-31           |
|                      | COMPLEMENT                      | 7.41E-04           |

**Table S5.** List of antibody clones used for CyTOF.

|    | <b>Antibody</b> | <b>Clone</b> |
|----|-----------------|--------------|
| 1  | 41BB            | 4B4-1        |
| 2  | B7H3            | MIH42        |
| 3  | BTLA            | MIH26        |
| 4  | CCR7            | G043H7       |
| 5  | CD11b           | ICMF44       |
| 6  | CD11c           | Bu15         |
| 7  | CD123           | 6H6          |
| 8  | CD138           | M15          |
| 9  | CD15            | W6D3         |
| 10 | CD155           | SKIL4        |
| 11 | CD16            | 3G8          |
| 12 | CD19            | HIB19        |
| 13 | CD20            | S2H7         |
| 14 | CD200           | OX-104       |
| 15 | CD21            | BL13         |
| 16 | CD23            | EBVCS-5      |
| 17 | CD24            | ML5          |
| 18 | CD25            | 2A3          |
| 19 | CD27            | L128         |
| 20 | CD28            | CD28.2       |
| 21 | CD3             | UCHT1        |
| 22 | CD33            | WM53         |
| 23 | CD38            | HIT2         |
| 24 | CD4             | RPA-T4       |
| 25 | CD44            | IM7          |
| 26 | CD45RO          | UCHL1        |
| 27 | CD56            | HCD56        |
| 28 | CD57            | HCD57        |

|    | <b>Antibody</b> | <b>Clone</b> |
|----|-----------------|--------------|
| 29 | CD69            | FN50         |
| 30 | CD8             | RPA-T8       |
| 31 | CD80            | 2D10.4       |
| 32 | CD81            | 5A6          |
| 33 | CD95            | DX2          |
| 34 | CTLA4           | 14D3         |
| 35 | CXCR4           | 12G5         |
| 36 | CXCR5           | RF8132       |
| 37 | DNAM-1          | TX25         |
| 38 | FOXP3           | PCH101       |
| 39 | Granzyme        | GB11         |
| 40 | HLADR           | L243         |
| 41 | HVEM            | 122          |
| 42 | ICOS            | C398.4A      |
| 43 | Ig Kappa        | MHK-49       |
| 44 | Ig Lamba        | MHK-38       |
| 45 | IgM             | MHM-88       |
| 46 | Ki67            | Ki-67        |
| 47 | LAG3            | 11C3C65      |
| 48 | NKG2D           | OW72         |
| 49 | OX-40           | ACT35        |
| 50 | PD1             | EH12.2H7     |
| 51 | PD-L1           | MIH1         |
| 52 | SLAMF7          | 162.1        |
| 53 | SOX2            | 030-678      |
| 54 | T-Bet           | 4B10         |
| 55 | TIGIT           | MBSA43       |
| 56 | TIM3            | F38-2E2      |

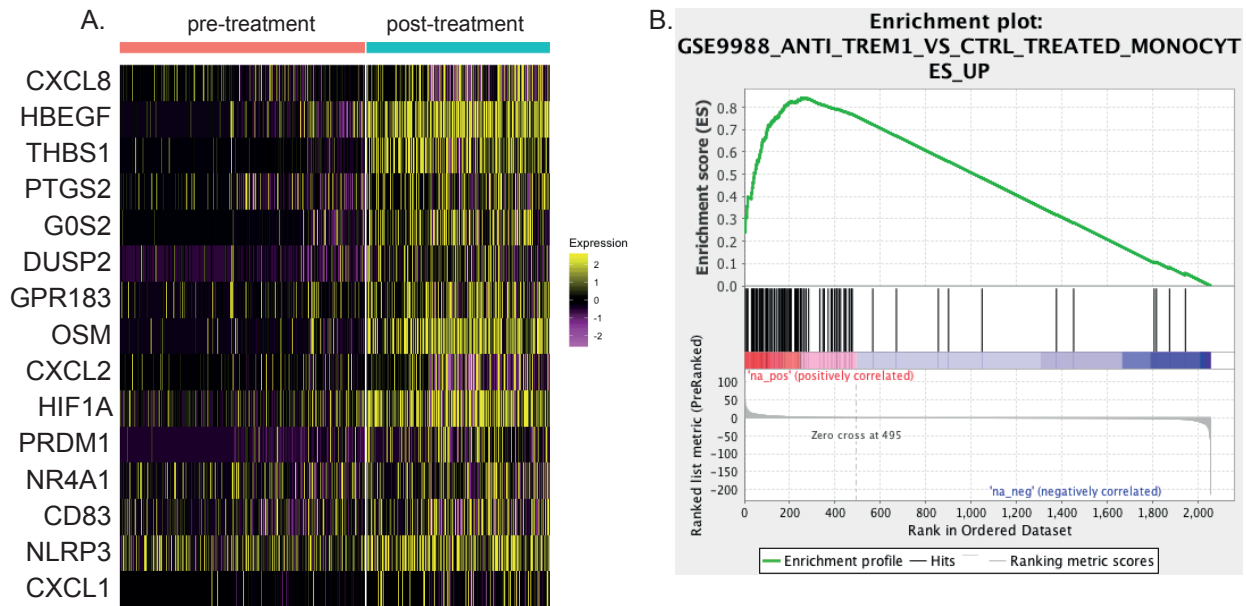

**Figure S1: Single-cell RNA sequencing differential gene expression in classical (CD14<sup>+</sup> CD16<sup>-</sup>) monocytes post vs. pre anti-PD-L1 treatment.**

A. Heatmap of selected significantly differentially expressed genes (Wilcoxon rank-sum test Bonferroni corrected  $p < 0.05$ ) with increased expression in the CD16<sup>-</sup> monocyte cluster post-treatment relative to the baseline CD16<sup>-</sup> monocyte cluster. B. Gene Set Enrichment Analysis (GSEA) pathway analysis of all significantly differentially genes in CD16<sup>-</sup> monocytes post- versus pre-treatment revealed enrichment of gene sets associated with activated/stimulated monocytes after treatment relative to baseline. Representative enriched pathway: anti-TREM1 stimulated monocytes (corresponding to post-treatment monocytes) versus control unstimulated monocytes (corresponding to pre-treatment monocytes).

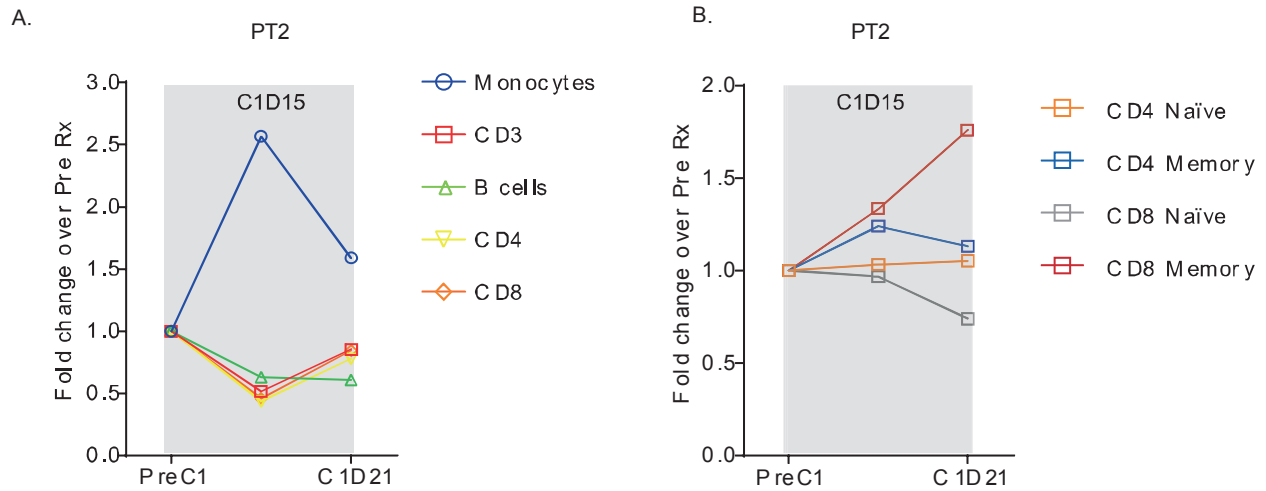

**Figure S2: Changes in circulating immune cells of AMM patient following therapy with atezolizumab.**

A. Changes in circulating CD3, CD4, CD8 T cells, monocytes and B cells at day 15 (C1D15) and 21 (C1D21) following therapy with atezolizumab. Data shows fold change compared to pre therapy (PreC1). B. Change in circulating CD4 and CD8 naïve and memory T cells at day 15 (C1D15) and 21 (C1D21) following therapy with atezolizumab. Data shows fold change compared to pre therapy (PreC1).



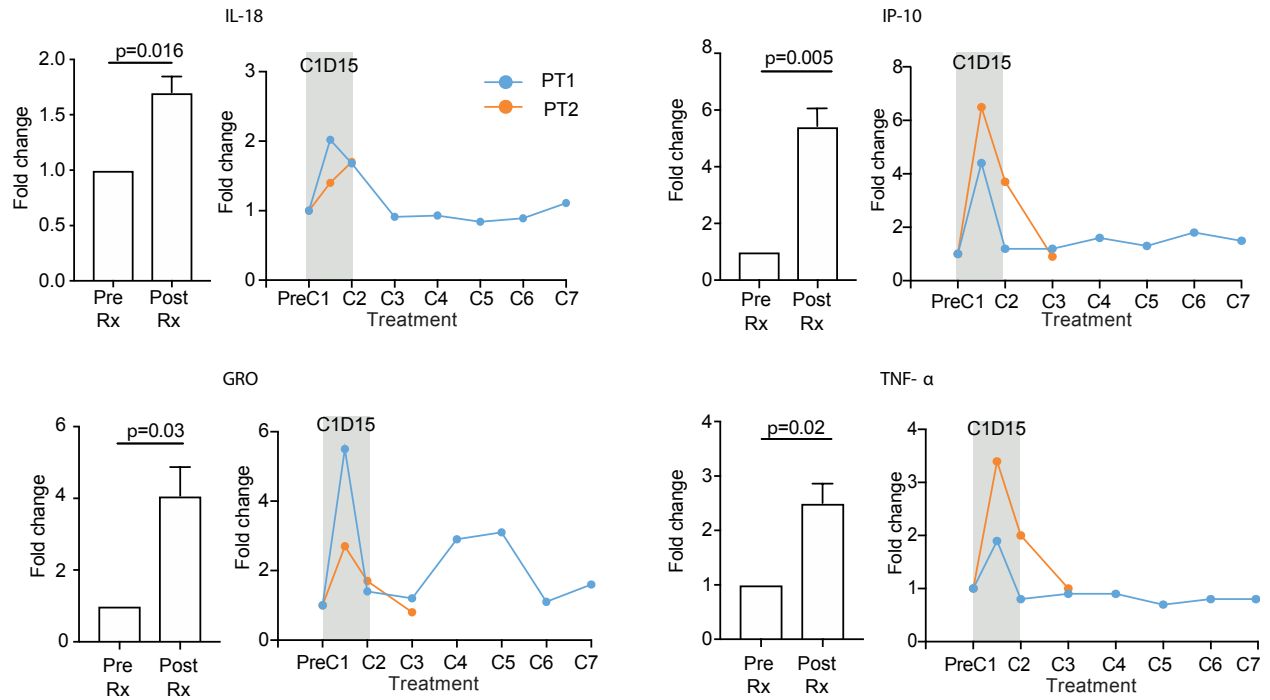

**Figure S3: Changes in plasma cytokines following therapy with atezolizumab in AMM patients.**

Plasma obtained pre therapy (PreC1), 15 days following first dose of atezolizumab (C1D15) and prior to cycles 2-7 (C2-C7) was analyzed for presence of IL-18, IP-10, GRO and TNF- $\alpha$ . Bar graph shows plasma levels pre (PreRx) and post cycle 1 (PostRx; n=2 patients) as fold change compared to pre therapy. The line graphs show changes in cytokines over time.

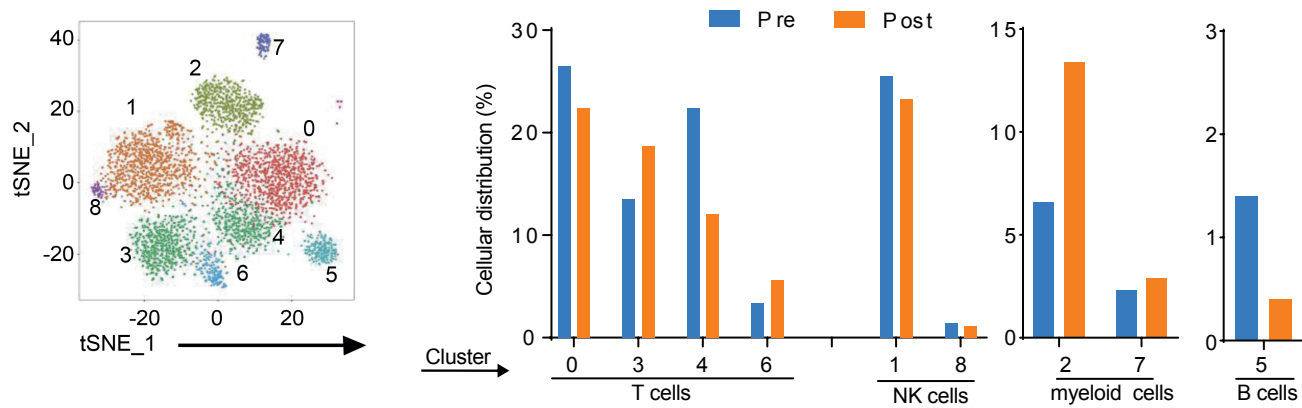

**Figure S4: Changes in transcriptome profile in PBMCs following therapy with atezolizumab.**

Single cell RNA sequencing analysis was performed on PBMCs obtained prior to therapy and 15 days following start of atezolizumab (Patient 1 as in figure 3E). TSNE plot shows distinct cell clusters as determined by unsupervised cluster analysis. Bar graph shows the percent of cells in each of these distinct populations pre- and post-treatment.

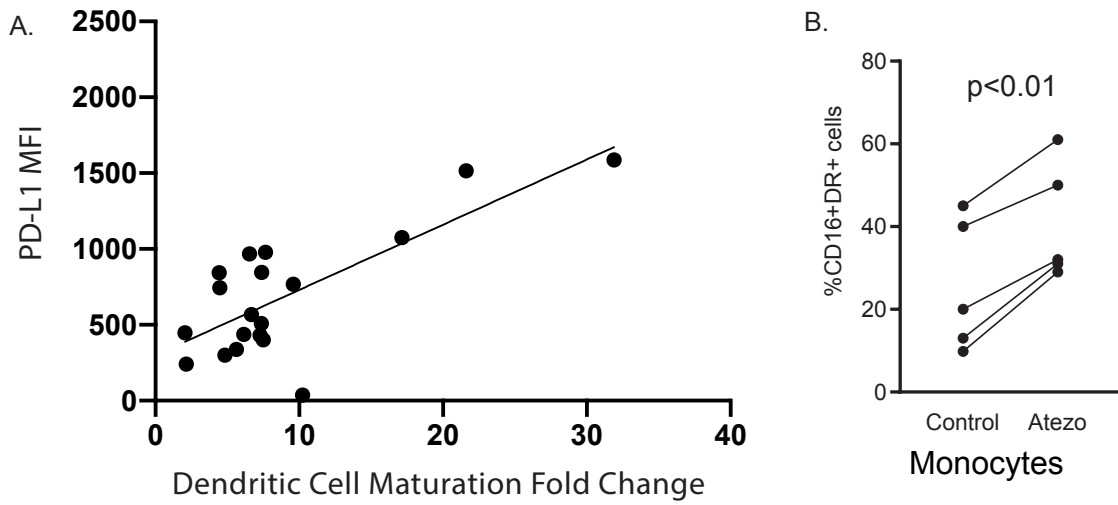

**Figure S5: Atezolizumab-induced changes in myeloid cells in culture**

A. Correlation of PD-L1 expression and changes in dendritic cell maturation markers (CD83, CD80) following exposure of monocyte-derived dendritic cells to CD40L + atezolizumab compared to untreated control. B. Changes in CD14+ CD16+ HLA-DR+ myeloid cells in bone marrow mononuclear cells cultured with atezolizumab versus control.

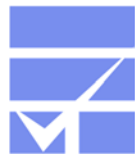

# CONSORT

TRANSPARENT REPORTING of TRIALS

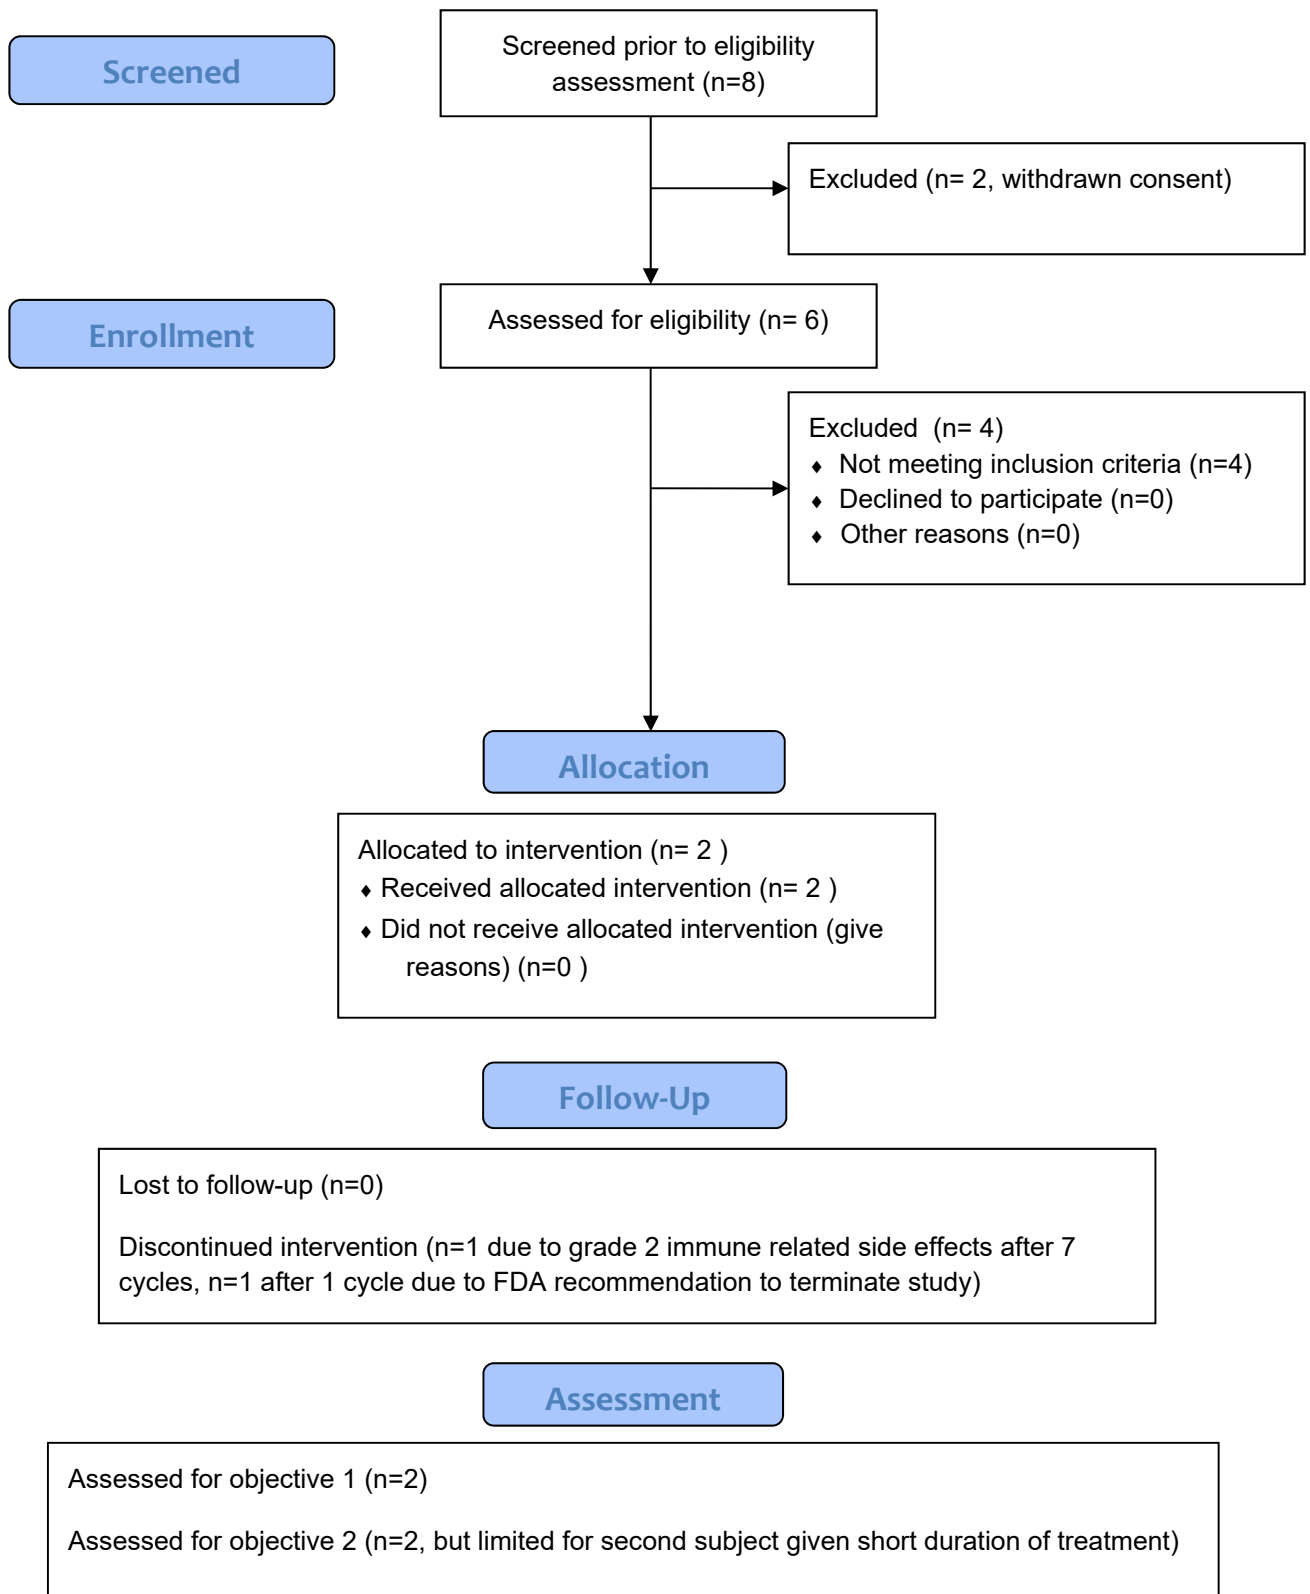

Supplement: sd1 [file 1]
