# Supplementary material for: Differential effects of PD-L1 versus PD-1 blockade on myeloid inflammation in human cancer
Source: JCI journal article supplement (doi:10.1172/jci.insight.129353), 2020-05-19
Supplement: sd2 [file 2]

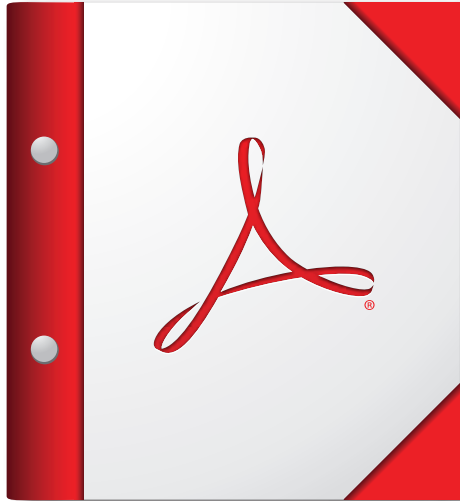

**For the best experience, open this PDF portfolio in  
Acrobat X or Adobe Reader X, or later.**

[Get Adobe Reader Now!](#)
